# Supplementary material
Source: PubMed Central journal article supplement (PMC3359760)
Supplement: NIHMS377593-supplement-Supplementary_data.pdf [file NIHMS377593-supplement-Supplementary_data.pdf]

## Supplementary Online Material

### **Title: Disruption of circadian rhythms accelerates development of diabetes through pancreatic beta-cell loss and dysfunction**

**John E. Gale<sup>1</sup>, Heather I. Cox<sup>1</sup>, Jingyi Qian<sup>2</sup>, Gene D. Block<sup>2</sup>, Christopher S. Colwell<sup>2</sup> and Aleksey V. Matveyenko<sup>1</sup>**

**1** Larry L. Hillblom Islet Research Center, University of California Los Angeles, David Geffen School of Medicine, Los Angeles, California

**2** Departments of Psychiatry and Biobehavioral Sciences, University of California Los Angeles, David Geffen School of Medicine, Los Angeles, California

## SUPPLEMENTAL FIGURE 1

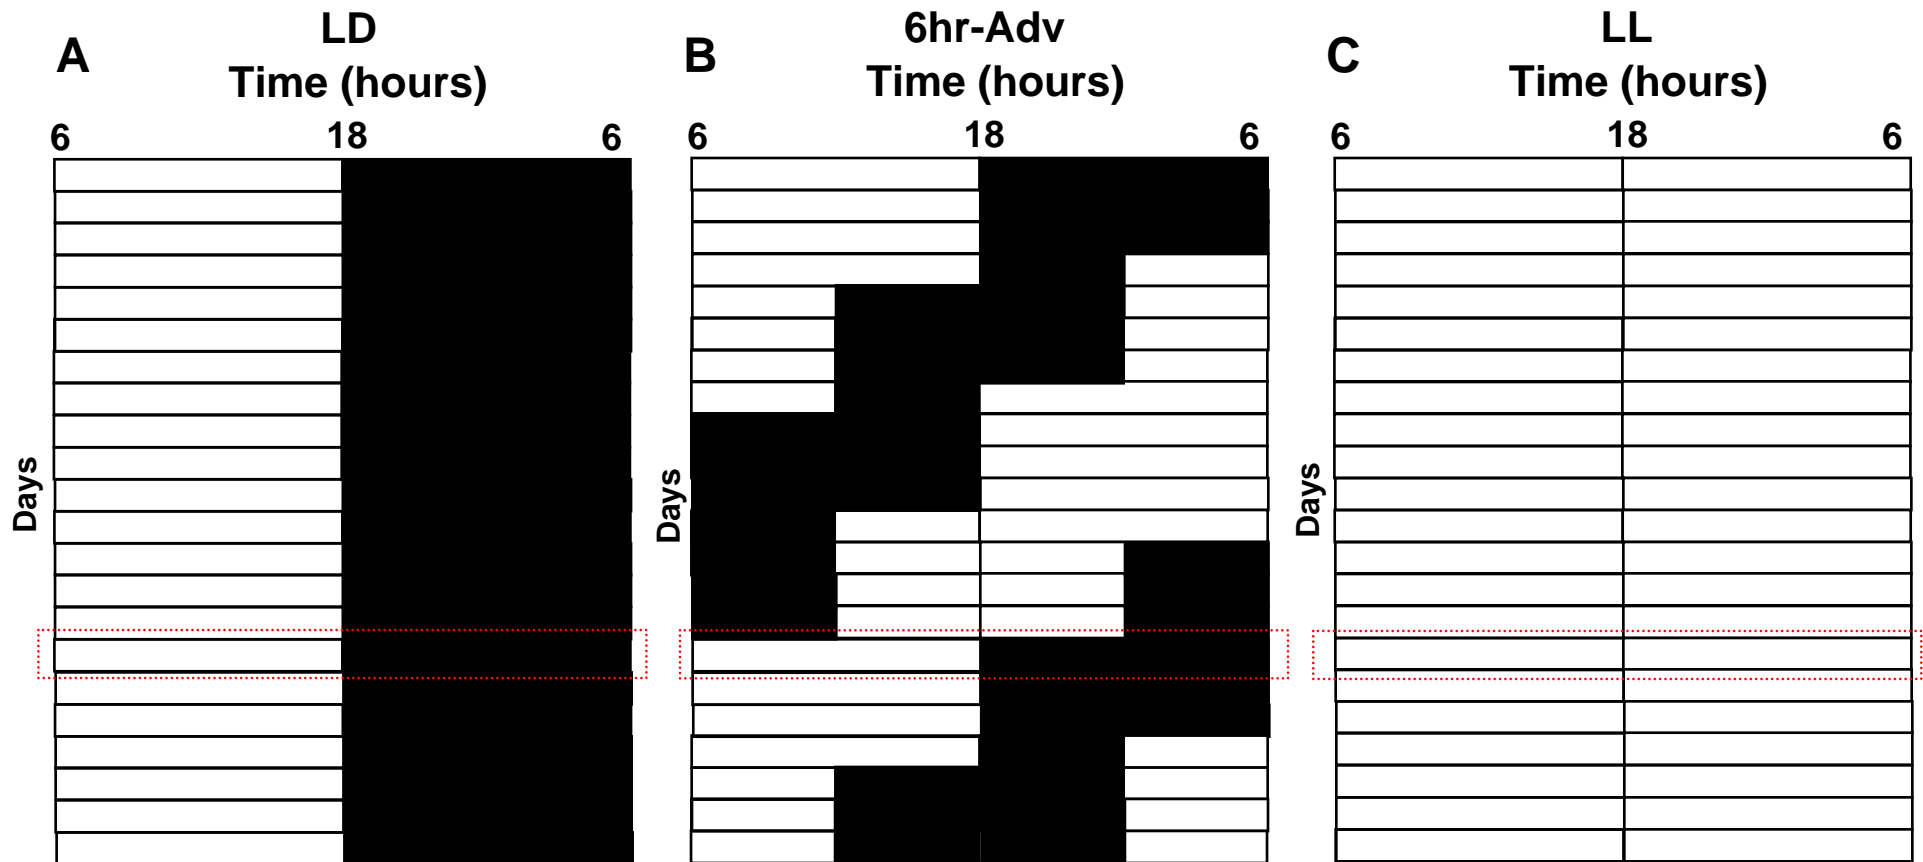

**Supplemental Figure 1. Schematic representation of 3 light cycle protocols employed in the study.** Wild Type and diabetes-prone HIP rats were exposed to 10 weeks of either (A) normal LD cycle (lights on at 6:00hr, lights off 18:00hr) or experimental changes in the light-dark cycle produced by (B) 6h advance of the light cycle every 3 days for 10 weeks (6hr-ADV) or by (C) 24-hour constant light (LL). Red rectangle represents under what light conditions glucose, melatonin and hyperglycemic clamp studies were performed in the three light groups.
